# Supplementary material
Source: PubMed Central journal article supplement (PMC11070986)
Supplement: NIHMS1985227-supplement-Supplementary_material-1.pdf [file NIHMS1985227-supplement-Supplementary_material-1.pdf]

**Supplementary information**

---

**Structural insights into vesicular  
monoamine storage and drug interactions**

---

In the format provided by the  
authors and unedited

## Supplementary Discussion

### Cytoplasmic-open transition is very slow in absence of a proton gradient

In the absence of a proton gradient, VMAT1 predominantly adopts a luminal-open conformation that is maintained by extensive gating interactions (Fig. 2b). The cytoplasmic-open transition occurs very slowly, as inferred from the binding rate of reserpine, which recognizes VMATs in their cytoplasmic-open conformation<sup>1,2</sup> (Fig. 2). Without a proton gradient, reserpine binding takes over 24 h to reach equilibrium<sup>3</sup>, indicating that although the unprotonated VMAT1 can still transition to the cytoplasmic-open state, this process occurs at a very slow rate. In contrast, proton gradient accelerates the reserpine binding, which reaches saturation in approximately 10 min<sup>3,4</sup>. Thus, protonation at vesicular acidic pH destabilizes the luminal-open state and facilitates the cytoplasmic-open transition.

### Cytoplasmic-open transition remains rate limiting for substrate transport with a proton gradient

In presence of a proton gradient, the cytoplasmic-open transition remains the rate-limiting step during the vesicular import mediated by VMATs<sup>2</sup>. Their  $K_M$  for substrate transport is 10-100 times lower (better) than substrate-binding  $K_D$ <sup>5</sup>. In other words, the uptake with a substrate-occupied binding site ( $K_M$ ) is much faster than the reappearance of the unoccupied binding site ( $K_D$ ), i.e., the protonation-driven cytoplasmic-open transition<sup>2</sup>. In addition, VMAT transports different substrates with similar  $V_{max}$ <sup>6,7</sup>, suggesting that a conformational transition, instead of substrate binding or release, is the rate-limiting step for the transport process.

## Reserpine treatment induces dimer formation

For cryo-EM studies, the cells were treated with reserpine for 10 min before membrane disruption. Because proton gradient is present at this stage, a fraction of VMAT1 can bind reserpine. The reserpine-bound fraction adopts a cytoplasmic-open conformation, while the unbound fraction is preferably luminal open. Following membrane solubilization, a molecule at the cytoplasmic-open conformation is prone to dimerize, either with another reserpine-bound molecule or with an unbound, luminal-open molecule. The membrane solubilization also eliminates the proton gradient, and under this condition, the luminal-open monomer maintains a stable conformation (see above). The reserpine-bound monomer is also stable because this inhibitor is nearly irreversible<sup>8</sup>. Consequently, we observe reserpine/unbound or reserpine/reserpine dimers in alternate conformations.

## References

- 1 Darchen, F., Scherman, D. & Henry, J. P. Reserpine binding to chromaffin granules suggests the existence of two conformations of the monoamine transporter. *Biochemistry* **28**, 1692-1697, doi:10.1021/bi00430a040 (1989).
- 2 Parsons, S. M. Transport mechanisms in acetylcholine and monoamine storage. *FASEB J* **14**, 2423-2434, doi:10.1096/fj.00-0203rev (2000).
- 3 Scherman, D. & Henry, J. P. Reserpine binding to bovine chromaffin granule membranes. Characterization and comparison with dihydrotetabenazine binding. *Mol Pharmacol* **25**, 113-122 (1984).

- 4 Rudnick, G., Steiner-Mordoch, S. S., Fishkes, H., Stern-Bach, Y. & Schuldiner, S. Energetics of reserpine binding and occlusion by the chromaffin granule biogenic amine transporter. *Biochemistry* **29**, 603-608, doi:10.1021/bi00455a002 (1990).
- 5 Scherman, D. & Henry, J. P. The catecholamine carrier of bovine chromaffin granules. Form of the bound amine. *Mol Pharmacol* **23**, 431-436 (1983).
- 6 Romanenko, V. G., Gebara, R., Miller, K. M. & Njus, D. Determination of transport parameters of permeant substrates of the vesicular amine transporter. *Anal Biochem* **257**, 127-133, doi:10.1006/abio.1997.2546 (1998).
- 7 Darchen, F., Scherman, D., Desnos, C. & Henry, J. P. Characteristics of the transport of the quaternary ammonium 1-methyl-4-phenylpyridinium by chromaffin granules. *Biochem Pharmacol* **37**, 4381-4387, doi:10.1016/0006-2952(88)90621-1 (1988).
- 8 Schuldiner, S., Liu, Y. & Edwards, R. H. Reserpine binding to a vesicular amine transporter expressed in Chinese hamster ovary fibroblasts. *J Biol Chem* **268**, 29-34 (1993).

**Supplementary Table 1. Alternate gating interactions formed at the cytoplasmic-open and vascular-open conformations.** Same as above are indicated by “..”.

| Cytoplasmic open (76 contacts) |         |      |        |         |      |       | Vascular open (145 contacts) |         |      |        |         |      |       |  |
|--------------------------------|---------|------|--------|---------|------|-------|------------------------------|---------|------|--------|---------|------|-------|--|
| NTD                            |         |      | CTD    |         |      |       |                              | NTD     |      |        | CTD     |      |       |  |
| Region                         | Residue | Atom | Region | Residue | Atom | Dist. | Region                       | Residue | Atom | Region | Residue | Atom | Dist. |  |
| TM1                            | V42     | CG1  | TM7    | P324    | CG   | 3.98  |                              |         |      |        |         |      |       |  |
| ..                             | ..      | ..   | TM8    | F342    | CE2  | 3.69  |                              |         |      |        |         |      |       |  |
| ..                             | ..      | CG2  | TM7    | E320    | CB   | 3.94  |                              |         |      |        |         |      |       |  |
| ..                             | ..      | ..   | ..     | ..      | CG   | 3.95  |                              |         |      |        |         |      |       |  |
| ..                             | ..      | ..   | ..     | ..      | OE1  | 3.96  |                              |         |      |        |         |      |       |  |
| L1/2                           | T47     | OG1  | TM8    | L338    | CD1  | 3.94  |                              |         |      |        |         |      |       |  |
| ..                             | ..      | CG2  | L7/8   | K335    | CD   | 3.55  |                              |         |      |        |         |      |       |  |
| ..                             | Q127    | N    | ..     | C332    | SG   | 3.69  |                              |         |      |        |         |      |       |  |
| ..                             | ..      | CA   | ..     | ..      | ..   | 3.88  |                              |         |      |        |         |      |       |  |
| ..                             | ..      | CB   | ..     | ..      | ..   | 3.43  |                              |         |      |        |         |      |       |  |
| ..                             | ..      | CG   | ..     | ..      | ..   | 3.89  |                              |         |      |        |         |      |       |  |
| ..                             | L132    | CB   | ..     | Q329    | OE1  | 3.93  |                              |         |      |        |         |      |       |  |
| ..                             | ..      | ..   | TM7    | I325    | CG2  | 3.68  |                              |         |      |        |         |      |       |  |
| ..                             | ..      | ..   | ..     | ..      | CD1  | 3.37  |                              |         |      |        |         |      |       |  |
| ..                             | ..      | CG   | ..     | ..      | CD1  | 3.23  |                              |         |      |        |         |      |       |  |
| ..                             | ..      | CD1  | ..     | ..      | CD1  | 3.44  |                              |         |      |        |         |      |       |  |
| ..                             | E133    | O    | L11/12 | K453    | NZ   | 3.41  |                              |         |      |        |         |      |       |  |
| ..                             | ..      | OE2  | ..     | ..      | O    | 3.6   |                              |         |      |        |         |      |       |  |
| ..                             | E134    | CA   | ..     | ..      | NZ   | 3.72  |                              |         |      |        |         |      |       |  |
| ..                             | ..      | C    | ..     | ..      | NZ   | 3.89  |                              |         |      |        |         |      |       |  |
| ..                             | ..      | O    | ..     | ..      | NZ   | 3.35  |                              |         |      |        |         |      |       |  |
| ..                             | I136    | CG2  | TM11   | G449    | O    | 4     |                              |         |      |        |         |      |       |  |
| ..                             | T137    | CG2  | L11/12 | K453    | NZ   | 3.92  |                              |         |      |        |         |      |       |  |
| TM2                            | G140    | CA   | TM11   | P445    | O    | 3.89  |                              |         |      |        |         |      |       |  |
| ..                             | ..      | O    | ..     | ..      | CB   | 3.26  |                              |         |      |        |         |      |       |  |
| ..                             | ..      | ..   | ..     | ..      | C    | 3.86  |                              |         |      |        |         |      |       |  |
| ..                             | A144    | CA   | ..     | F441    | O    | 3.93  | TM2                          | A144    | CB   | TM11   | S446    | OG   | 3.03  |  |
| ..                             | ..      | CB   | ..     | A442    | O    | 3.72  | ..                           | ..      | ..   | ..     | ..      | ..   | ..    |  |
| ..                             | A147    | CB   | ..     | F441    | C    | 3.69  | ..                           | A147    | CB   | ..     | F441    | C    | 3.63  |  |
| ..                             | ..      | ..   | ..     | A442    | N    | 3.36  | ..                           | ..      | ..   | ..     | A442    | N    | 3.16  |  |
| ..                             | ..      | ..   | ..     | ..      | CA   | 3.51  | ..                           | ..      | ..   | ..     | ..      | CA   | 3.26  |  |
| ..                             | ..      | ..   | ..     | ..      | CB   | 3.29  | ..                           | ..      | ..   | ..     | ..      | CB   | 3.44  |  |
| ..                             | ..      | ..   | ..     | C438    | O    | 3.28  | ..                           | ..      | ..   | ..     | C438    | O    | 3.58  |  |
| ..                             | ..      | ..   | ..     | F441    | CB   | 3.97  | ..                           | ..      | ..   | ..     | ..      | ..   | ..    |  |
| ..                             | Q150    | CG   | ..     | C438    | SG   | 3.8   | ..                           | Q150    | CG   | ..     | C438    | SG   | 3.41  |  |
| ..                             | ..      | CD   | ..     | ..      | SG   | 3.5   | ..                           | ..      | CD   | ..     | ..      | SG   | 3.27  |  |
| ..                             | ..      | OE1  | ..     | ..      | SG   | 3.05  | ..                           | ..      | NE2  | ..     | ..      | SG   | 2.53  |  |
|                                |         |      |        |         |      |       | ..                           | Q150    | NE2  | ..     | D434    | CG   | 3.68  |  |
|                                |         |      |        |         |      |       | ..                           | ..      | ..   | ..     | ..      | OD1  | 3.01  |  |
|                                |         |      |        |         |      |       | ..                           | ..      | ..   | ..     | ..      | OD2  | 3.55  |  |
| ..                             | L151    | CG   | ..     | ..      | CB   | 3.83  | ..                           | L151    | O    | ..     | V435    | CG2  | 3.84  |  |
| ..                             | ..      | CD1  | ..     | M439    | SD   | 3.78  | ..                           | ..      | ..   | ..     | ..      | ..   | ..    |  |
| ..                             | ..      | CD2  | ..     | C438    | CB   | 3.95  | ..                           | ..      | ..   | ..     | ..      | ..   | ..    |  |
|                                |         |      |        |         |      |       | ..                           | N154    | CB   | ..     | V435    | CG2  | 3.61  |  |
|                                |         |      |        |         |      |       | ..                           | ..      | CG   | ..     | D434    | CG   | 3.96  |  |
| ..                             | N154    | CG   | ..     | D434    | OD2  | 3.97  | ..                           | ..      | ..   | ..     | ..      | OD2  | 3.04  |  |
|                                |         |      |        |         |      |       | ..                           | ..      | OD1  | ..     | ..      | OD2  | 2.97  |  |
|                                |         |      |        |         |      |       | ..                           | ..      | ND2  | ..     | A431    | O    | 3.84  |  |
|                                |         |      |        |         |      |       | ..                           | ..      | ..   | ..     | V435    | CG2  | 3.55  |  |
|                                |         |      |        |         |      |       | ..                           | ..      | ..   | ..     | D434    | CB   | 3.43  |  |
|                                |         |      |        |         |      |       | ..                           | ..      | ..   | ..     | ..      | CG   | 3.03  |  |
|                                |         |      |        |         |      |       | ..                           | ..      | ..   | ..     | ..      | OD1  | 3.92  |  |
| ..                             | N154    | ND2  | ..     | ..      | OD2  | 2.88  | ..                           | ..      | ..   | ..     | ..      | OD2  | 2.44  |  |
|                                |         |      |        |         |      |       | ..                           | ..      | ..   | ..     | ..      | C    | 3.63  |  |
|                                |         |      |        |         |      |       | ..                           | ..      | ..   | ..     | V435    | N    | 3.44  |  |
|                                |         |      |        |         |      |       | ..                           | ..      | ..   | ..     | ..      | CA   | 3.85  |  |
|                                |         |      |        |         |      |       | L2/3                         | N162    | O    | L6/7   | P285    | CA   | 3.59  |  |
|                                |         |      |        |         |      |       | ..                           | ..      | ..   | ..     | ..      | C    | 3.85  |  |
|                                |         |      |        |         |      |       | ..                           | ..      | ..   | ..     | E286    | N    | 3.15  |  |
|                                |         |      |        |         |      |       | ..                           | ..      | CG   | TM11   | V425    | CG1  | 3.44  |  |
|                                |         |      |        |         |      |       | ..                           | ..      | OD1  | ..     | ..      | CG1  | 2.94  |  |
|                                |         |      |        |         |      |       | ..                           | ..      | ND2  | ..     | A288    | O    | 3.17  |  |
|                                |         |      |        |         |      |       | ..                           | ..      | ..   | ..     | V425    | CG2  | 3.66  |  |
|                                |         |      |        |         |      |       | ..                           | ..      | ..   | ..     | G290    | N    | 3.61  |  |
|                                |         |      |        |         |      |       | ..                           | ..      | ..   | ..     | V425    | CB   | 4     |  |

|      |      |     |    |      |     |      |     |             |     |  |             |     |      |
|------|------|-----|----|------|-----|------|-----|-------------|-----|--|-------------|-----|------|
|      |      |     |    |      |     |      | ..  | ..          | ..  |  | ..          | CG1 | 3.21 |
|      |      |     |    |      |     |      | ..  | R163        | O   |  | V283        | CG1 | 3.57 |
|      |      |     |    |      |     |      | ..  | I164        | C   |  | S284        | O   | 3.67 |
|      |      |     |    |      |     |      | ..  | ..          | O   |  | ..          | O   | 3.64 |
|      |      |     |    |      |     |      | ..  | ..          | ..  |  | ..          | N   | 3.64 |
|      |      |     |    |      |     |      | ..  | ..          | CD1 |  | V283        | CG1 | 3.69 |
|      |      |     |    |      |     |      | ..  | ..          | ..  |  | ..          | CG2 | 3.81 |
|      |      |     |    |      |     |      | ..  | G165        | N   |  | S284        | O   | 3.71 |
|      |      |     |    |      |     |      | ..  | ..          | CA  |  | ..          | O   | 3.85 |
| L2/3 | Y166 | OH  | .. | Y426 | OH  | 3.87 | ..  | Y166        | CE1 |  | <b>E286</b> | CD  | 3.77 |
|      |      |     |    |      |     |      | ..  | ..          | ..  |  | ..          | OE2 | 2.99 |
|      |      |     |    |      |     |      | ..  | ..          | CZ  |  | ..          | OE2 | 2.98 |
|      |      |     |    |      |     |      | ..  | ..          | OH  |  | ..          | OE1 | 3.92 |
|      |      |     |    |      |     |      | ..  | ..          | ..  |  | ..          | CD  | 3.47 |
|      |      |     |    |      |     |      | ..  | ..          | ..  |  | ..          | OE2 | 2.38 |
|      |      |     |    |      |     |      | ..  | <b>H167</b> | CB  |  | P280        | CB  | 3.97 |
|      |      |     |    |      |     |      | ..  | I168        | CD1 |  | K282        | C   | 3.98 |
|      |      |     |    |      |     |      | ..  | ..          | ..  |  | ..          | O   | 3.18 |
| TM4  | S208 | CB  | .. | Y430 | OH  | 3.99 | TM4 | S208        | OG  |  | <i>D434</i> | CG  | 3.98 |
|      |      |     |    |      |     |      | ..  | ..          | ..  |  | ..          | OD1 | 3.97 |
|      |      |     |    |      |     |      | ..  | V209        | CG2 |  | A431        | CA  | 3.71 |
|      |      |     |    |      |     |      | ..  | L212        | CD2 |  | M411        | SD  | 3.97 |
| TM4  | A216 | CB  | .. | ..   | CZ  | 3.81 | ..  | A216        | CB  |  | Y426        | CB  | 3.95 |
|      |      |     |    |      |     |      | ..  | ..          | ..  |  | ..          | CG  | 3.77 |
| ..   | ..   | ..  | .. | Y426 | CD2 | 3.95 |     |             |     |  |             | CD2 | 3.86 |
| ..   | ..   | ..  | .. | ..   | CE2 | 3.65 |     |             |     |  |             | CE2 | 3.53 |
|      |      |     |    |      |     |      |     | <b>D222</b> | O   |  | R365        | NH2 | 3.53 |
|      |      |     |    |      |     |      |     |             | CG  |  |             | NH2 | 2.96 |
|      |      |     |    |      |     |      |     |             | OD1 |  |             | NH2 | 2.75 |
|      |      |     |    |      |     |      |     |             | ..  |  |             | CZ  | 3.83 |
|      |      |     |    |      |     |      |     |             | OD2 |  |             | NH2 | 2.84 |
|      |      |     |    |      |     |      |     |             | ..  |  |             | NE  | 3.91 |
|      |      |     |    |      |     |      |     |             | ..  |  |             | CZ  | 3.82 |
|      |      |     |    |      |     |      |     | <b>H223</b> | CA  |  | N361        | ND2 | 3.16 |
|      |      |     |    |      |     |      |     |             | C   |  |             | ND2 | 3.87 |
|      |      |     |    |      |     |      |     |             | O   |  |             | ND2 | 3.68 |
|      |      |     |    |      |     |      |     |             | CB  |  |             | ND2 | 3.17 |
|      |      |     |    |      |     |      |     |             | CG  |  |             | CB  | 3.77 |
|      |      |     |    |      |     |      |     |             | ..  |  |             | CG  | 3.74 |
|      |      |     |    |      |     |      |     |             | ..  |  |             | ND2 | 3.19 |
|      |      |     |    |      |     |      |     |             | ND1 |  |             | CB  | 3.45 |
|      |      |     |    |      |     |      |     |             | ..  |  |             | CG  | 3.87 |
|      |      |     |    |      |     |      |     |             | ..  |  |             | ND2 | 3.45 |
|      |      |     |    |      |     |      |     |             | CD2 |  |             | CB  | 3.85 |
|      |      |     |    |      |     |      |     |             | ..  |  |             | CG  | 3.96 |
|      |      |     |    |      |     |      |     |             | ..  |  |             | ND2 | 3.82 |
|      |      |     |    |      |     |      |     |             | CE1 |  |             | CB  | 3.35 |
|      |      |     |    |      |     |      |     |             | NE2 |  |             | CB  | 3.59 |
| L4/5 | R225 | NH1 | .. | Y426 | CB  | 3.84 |     | R225        | NH1 |  | Y426        | CE2 | 3.75 |
|      |      |     |    |      |     |      |     |             | ..  |  |             | CZ  | 3.88 |
|      |      |     |    |      |     |      |     |             | ..  |  |             | OH  | 3.74 |
|      |      |     |    |      |     |      |     |             | NH2 |  | G415        | C   | 3.64 |
|      |      |     |    |      |     |      |     |             | ..  |  | ..          | O   | 3.73 |
|      |      |     |    |      |     |      |     |             | ..  |  | <b>H416</b> | N   | 3.8  |
|      |      |     |    |      |     |      |     |             | ..  |  | <b>D419</b> | OD2 | 3.59 |
|      |      |     |    |      |     |      |     | G226        | CA  |  | P412        | CG  | 3.68 |
|      |      |     |    |      |     |      |     | M229        | CE  |  | Y430        | CZ  | 3.43 |
|      |      |     |    |      |     |      |     |             | ..  |  | ..          | OH  | 2.99 |
|      |      |     |    |      |     |      |     |             | ..  |  | P412        | CA  | 3.84 |
|      |      |     |    |      |     |      |     |             | ..  |  | Y430        | CE1 | 3.22 |
|      |      |     |    |      |     |      |     |             | ..  |  | M411        | O   | 3.29 |
|      |      |     |    |      |     |      |     |             | ..  |  | ..          | C   | 3.19 |
|      |      |     |    |      |     |      |     |             | ..  |  | ..          | CB  | 3.23 |
|      |      |     |    |      |     |      |     |             | ..  |  | P412        | N   | 3.44 |
|      |      |     |    |      |     |      |     |             | ..  |  | M411        | CA  | 3.73 |
|      |      |     |    |      |     |      |     | G230        | CA  |  | T353        | O   | 3.87 |
|      |      |     |    |      |     |      |     |             | C   |  | ..          | O   | 3.87 |
|      |      |     |    |      |     |      |     |             | O   |  | ..          | O   | 3.46 |
|      |      |     |    |      |     |      |     |             | ..  |  | ..          | OG1 | 3.75 |
|      |      |     |    |      |     |      |     | L233        | C   |  | ..          | OG1 | 3.76 |
|      |      |     |    |      |     |      |     |             | ..  |  | ..          | CG2 | 3.81 |
|      |      |     |    |      |     |      |     |             | O   |  | ..          | CG2 | 3.96 |
|      |      |     |    |      |     |      |     |             | CB  |  | ..          | OG1 | 3.08 |
|      |      |     |    |      |     |      |     |             | CD1 |  | <b>D407</b> | CB  | 3.64 |
|      |      |     |    |      |     |      |     | G234        | N   |  | T353        | OG1 | 3.76 |

|      |      |     |      |      |     |      |  |      |     |      |     |      |
|------|------|-----|------|------|-----|------|--|------|-----|------|-----|------|
|      |      |     |      |      |     |      |  | CA   |     | N354 | CG2 | 3.32 |
|      |      |     |      |      |     |      |  |      |     | T353 | OD1 | 3.35 |
|      |      |     |      |      |     |      |  |      |     |      | CG2 | 3.05 |
| TM5  | A237 | CB  | TM8  | L350 | CD1 | 3.63 |  | A237 | CB  | L350 | CA  | 3.88 |
|      |      |     |      |      |     |      |  |      |     | Y349 | CD1 | 3.15 |
|      |      |     |      |      |     |      |  |      |     |      | CE1 | 3.32 |
|      |      |     |      |      |     |      |  | L238 | N   | L350 | CD1 | 3.84 |
|      |      |     |      |      |     |      |  |      | CA  |      | CD1 | 3.73 |
|      |      |     |      |      |     |      |  |      | CB  |      | CD1 | 3.75 |
|      |      |     |      |      |     |      |  | L241 | CD1 | L343 | CD1 | 3.51 |
|      |      |     |      |      |     |      |  |      | CD2 | V347 | CG2 | 3.85 |
| ..   | P245 | CA  | ..   | G339 | C   | 3.93 |  |      |     |      |     |      |
| ..   | ..   | CG  | ..   | L343 | CG  | 3.99 |  |      |     |      |     |      |
| ..   | S248 | O   | L7/8 | W336 | CA  | 3.56 |  |      |     |      |     |      |
| ..   | ..   | ..  | ..   | ..   | CB  | 3.56 |  |      |     |      |     |      |
| ..   | ..   | CB  | ..   | ..   | O   | 3.86 |  |      |     |      |     |      |
| ..   | ..   | ..  | TM8  | G339 | N   | 3.36 |  |      |     |      |     |      |
| ..   | ..   | ..  | ..   | ..   | CA  | 3.66 |  |      |     |      |     |      |
| ..   | ..   | OG  | L7/8 | Q337 | N   | 3.66 |  |      |     |      |     |      |
| ..   | ..   | ..  | TM8  | L338 | N   | 3.68 |  |      |     |      |     |      |
| ..   | ..   | ..  | L7/8 | K335 | C   | 3.86 |  |      |     |      |     |      |
| ..   | ..   | ..  | ..   | ..   | O   | 3.05 |  |      |     |      |     |      |
| ..   | ..   | ..  | ..   | W336 | N   | 3.88 |  |      |     |      |     |      |
| ..   | ..   | ..  | ..   | ..   | CA  | 2.98 |  |      |     |      |     |      |
| ..   | ..   | ..  | ..   | ..   | C   | 2.89 |  |      |     |      |     |      |
| ..   | ..   | ..  | ..   | ..   | O   | 2.85 |  |      |     |      |     |      |
| ..   | ..   | ..  | TM8  | G339 | N   | 3.37 |  |      |     |      |     |      |
| L5/6 | E252 | CD  | L7/8 | W336 | CD1 | 3.51 |  |      |     |      |     |      |
| ..   | ..   | OE1 | ..   | K335 | N   | 3.61 |  |      |     |      |     |      |
| ..   | ..   | ..  | ..   | ..   | CA  | 3.71 |  |      |     |      |     |      |
| ..   | ..   | ..  | ..   | ..   | CB  | 3.49 |  |      |     |      |     |      |
| ..   | ..   | ..  | ..   | W336 | CG  | 3.51 |  |      |     |      |     |      |
| ..   | ..   | ..  | ..   | ..   | CD1 | 3.05 |  |      |     |      |     |      |
| ..   | ..   | ..  | ..   | K335 | C   | 3.54 |  |      |     |      |     |      |
| ..   | ..   | ..  | ..   | W336 | N   | 3    |  |      |     |      |     |      |
| ..   | ..   | ..  | ..   | ..   | CA  | 3.67 |  |      |     |      |     |      |
| ..   | ..   | ..  | ..   | ..   | CB  | 3.27 |  |      |     |      |     |      |
| ..   | ..   | OE2 | ..   | ..   | CD1 | 3.58 |  |      |     |      |     |      |
|      |      |     |      |      |     |      |  | Q274 | O   | P280 | CD  | 3.88 |
|      |      |     |      |      |     |      |  | L275 | CA  |      | CD  | 3.98 |
|      |      |     |      |      |     |      |  |      | CD2 |      | CD  | 3.87 |
|      |      |     |      |      |     |      |  | L278 | C   |      | N   | 3.61 |
|      |      |     |      |      |     |      |  |      |     |      | CD  | 3.87 |
|      |      |     |      |      |     |      |  |      | O   |      | N   | 3.74 |
|      |      |     |      |      |     |      |  | Q279 | N   |      | N   | 3.02 |
|      |      |     |      |      |     |      |  |      |     |      | CD  | 3.07 |
|      |      |     |      |      |     |      |  |      | CA  |      | N   | 2.46 |
|      |      |     |      |      |     |      |  |      |     |      | CA  | 3.85 |
|      |      |     |      |      |     |      |  |      |     |      | CD  | 2.94 |
|      |      |     |      |      |     |      |  |      | C   | S281 | N   | 3.42 |
|      |      |     |      |      |     |      |  |      |     | P280 | N   | 1.33 |
|      |      |     |      |      |     |      |  |      |     |      | CA  | 2.46 |
|      |      |     |      |      |     |      |  |      |     |      | CG  | 3.63 |
|      |      |     |      |      |     |      |  |      |     |      | CD  | 2.5  |
|      |      |     |      |      |     |      |  |      |     |      | C   | 3.31 |
|      |      |     |      |      |     |      |  |      |     |      | CB  | 3.58 |
|      |      |     |      |      |     |      |  |      | O   | S281 | N   | 3.16 |
|      |      |     |      |      |     |      |  |      |     | P280 | N   | 2.24 |
|      |      |     |      |      |     |      |  |      |     |      | CA  | 2.76 |
|      |      |     |      |      |     |      |  |      |     |      | CD  | 3.62 |
|      |      |     |      |      |     |      |  |      |     |      | C   | 3.43 |
|      |      |     |      |      |     |      |  | CB   |     |      | N   | 3.74 |

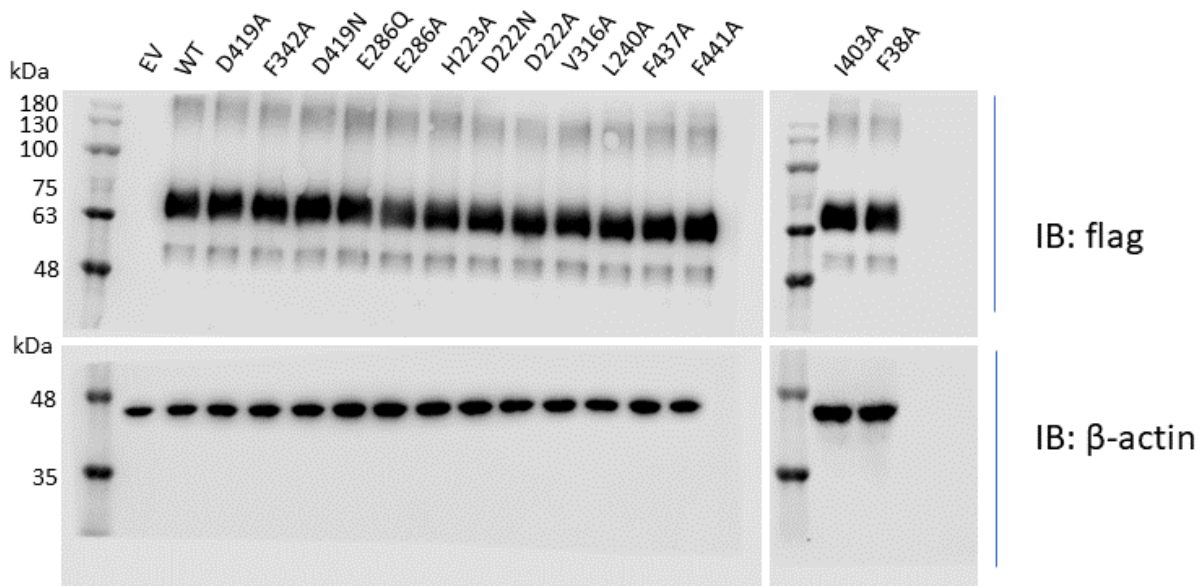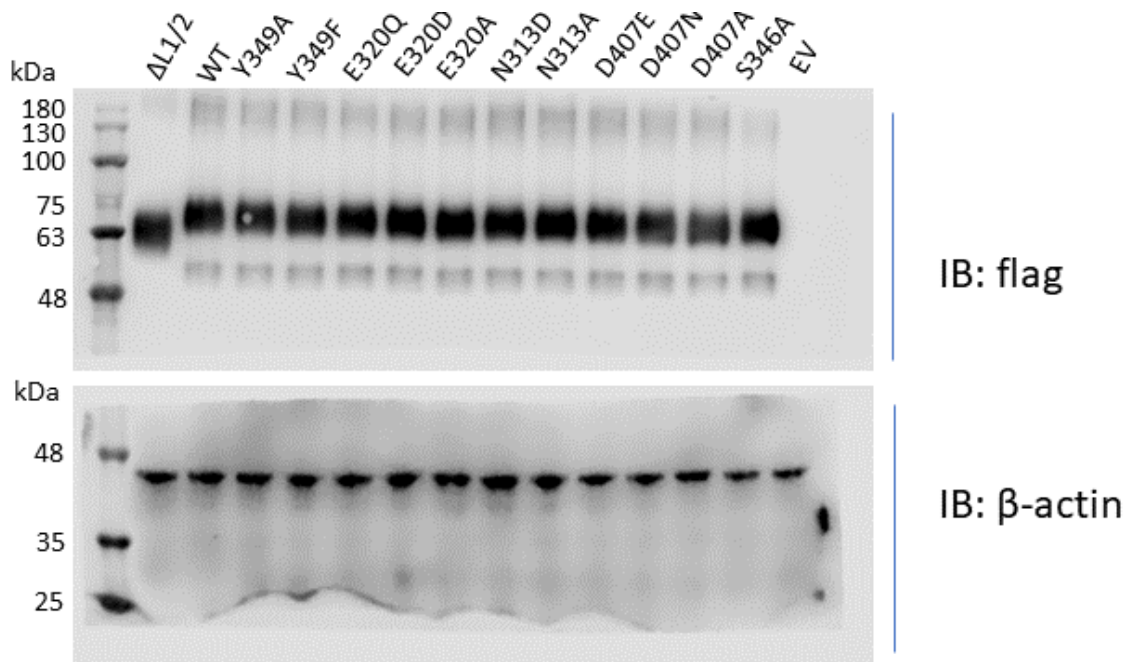

**Supplementary Figure 1. Western blot of human VMAT1 constructs showing their similar expression levels.** The anti-flag antibody (Cell Signaling Technology) and anti-actin antibody (Cell Signaling Technology) were used. These constructs are used for the monoamine uptake and binding assays in Figs. 1b, 1c, 3g, 3h, 5f, 5g, and Extended Data Figs.1 and 7f.



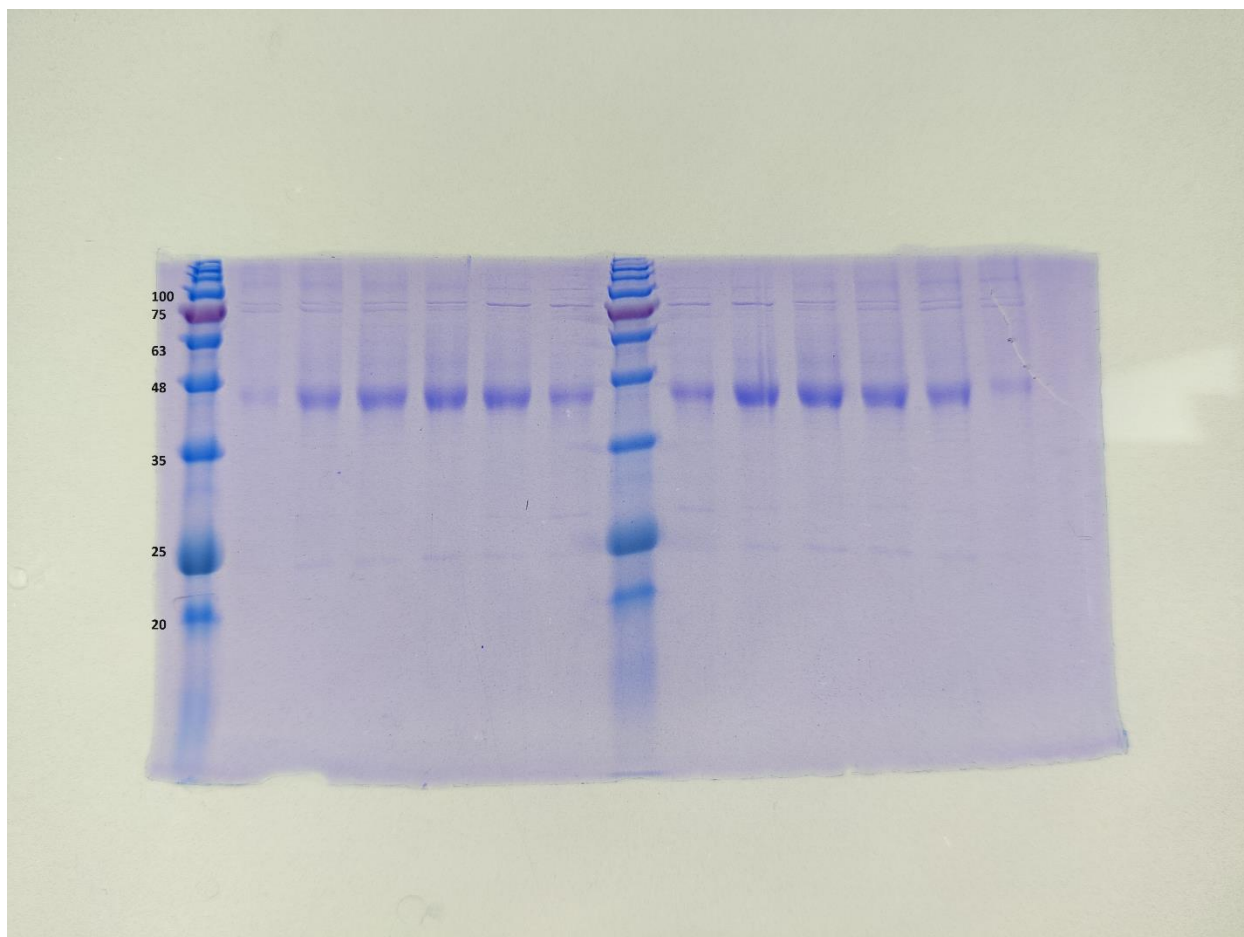

**Supplementary Figure 2. Uncropped gel for Extended Data Figure 2c.**
